# Supplementary material for: Natural Products from Antarctic Colonial Ascidians of the Genera Aplidium and Synoicum: Variability and Defensive Role
Source: MDPI journal article supplement (doi:10.3390/md10081741), 2012-08-20

## Supplementary Material

**Figure S1.** Proposed chemical structures of the new minority meridianins I–U detected by LC-HRMS/MS from *Aplidium falklandicum* 1.

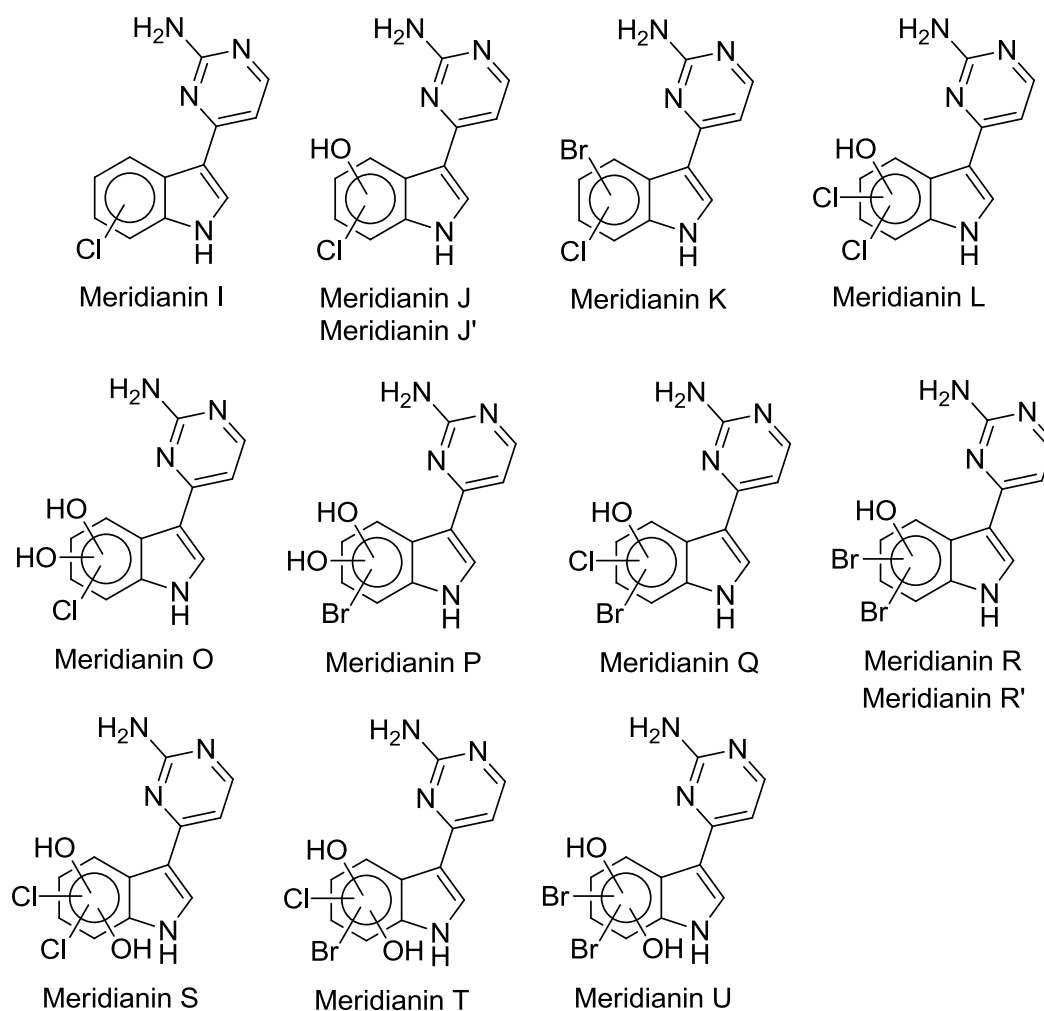

Supplement: s1 [file s1]
